# Supplementary material for: Aberrant FGF19 Expression Is Associated with Prognosis and Radiosensitivity in Gastric Cancer
Source: Research Square preprint supplement (doi:10.21203/rs.3.rs-8383155/v1), 2026-01-19
Supplement: Supplementary file 1 [file 0600898abb70b09d4a8837d3.docx]

**Table S1. Association between FGF19 expression and clinicopathological characteristics in gastric cancer patients**

| Clinicopathological characteristic | Cases (n) | Low FGF19 expression (n = 59) | High FGF19 expression (n = 56) | *χ²* | *P-value* |
| --- | --- | --- | --- | --- | --- |
| Age |  |  |  | 4.801 | 0.028 |
| < 67 years | 51 | 32(62.7%) | 19(37.3%) |  |  |
| ≥ 67years | 64 | 27(42.2%) | 37(57.8%) |  |  |
| Sex |  |  |  | 1.523 | 0.217 |
| Male | 80 | 38 (47.5%) | 42 (52.5%) |  |  |
| Female | 35 | 21 (60.0%) | 14 (40.0%) |  |  |
| T stage |  |  |  | 3.363 | 0.067 |
| T1–2 | 49 | 30 (61.2%) | 19 (38.8%) |  |  |
| T3–4 | 66 | 29 (43.9%) | 37 (56.1%) |  |  |
| N stage |  |  |  | 1.240 | 0.265 |
| N0 | 45 | 26 (57.8%) | 19 (42.2%) |  |  |
| N1–3 | 70 | 33 (47.1%) | 37 (52.9%) |  |  |
| Vascular invasion |  |  |  | 2.017 | 0.156 |
| Negative | 36 | 22 (61.1%) | 14 (38.9%) |  |  |
| Positive | 79 | 37 (46.8%) | 42 (53.2%) |  |  |
| Perineural invasion |  |  |  | 6.656 | 0.010 |
| Negative | 38 | 26 (68.4%) | 12 (31.6%) |  |  |
| Positive | 77 | 33 (42.9%) | 44 (57.1%) |  |  |
| TNM stage |  |  |  | 3.313 | 0.191 |
| Ⅰ | 38 | 24 (63.2%) | 14 (36.8%) |  |  |
| Ⅱ | 27 | 13 (48.1%) | 14 (51.9%) |  |  |
| Ⅲ | 50 | 22 (44.0%) | 28 (56.0%) |  |  |
| Tumor location |  |  |  | 1.697 | 0.428 |
| Upper | 39 | 18 (46.2%) | 21 (53.8%) |  |  |
| Middle | 26 | 16 (61.5%) | 10 (38.5%) |  |  |
| Lower | 44 | 21 (47.7%) | 23 (52.3%) |  |  |
| Tumor size |  |  |  | 0.005 | 0.946 |
| < 5 cm | 75 | 38 (50.7%) | 37 (49.3%) |  |  |
| ≥ 5 cm | 40 | 20 (50.0%) | 20 (50.0%) |  |  |

Note: Associations between FGF19 expression and clinicopathological characteristics in patients with gastric cancer. FGF19 expression was assessed by immunohistochemistry. Data are presented as number (percentage). Statistical comparisons were performed using χ² tests, as appropriate.
